# Supplementary material
Source: PubMed Central journal article supplement (PMC5812235)
Supplement: AnnalsATS.201706-500OC_cox_data_supplement.pdf [file AnnalsATS.201706-500OC_cox_data_supplement.pdf]

## Online Data Supplement

### **Palliative Care Planner (PCplanner): A Pilot Study to Evaluate Acceptability and Usability of an Electronic Health Records System-Integrated, Needs-Targeted App Platform**

Christopher E. Cox, MD MPH, Derek M. Jones, MDiv, Wen Reagan, PhD, Mary D. Key, Vinca Chow, MD, Jessica McFarlin, MD, David Casarett, MD, Claire J. Creutzfeldt, MD, Sharron L. Docherty, RN PhD

#### **Contents**

|                          |         |
|--------------------------|---------|
| 1. Expanded Methods..... | e1-e2   |
| 2. Figures.....          | e3-e4   |
| 3. Tables.....           | e5-e13  |
| 4. References.....       | e14-e15 |

#### **1. Expanded Methods**

**eTrigger validation process.** The e-triggers shown in [Table 1](#) were programmed in a 9-month long cycle of iterative revisions with EHR developers and clinical experts. These e-triggers were constructed from EHR vendor-agnostic Meaningful Use Common Data Set standards relevant to clinical care (e.g., SNOMED CT), pharmacy (e.g., RxNorm NLM standards), vital signs, laboratory results (LOINC), and physician billing to enable real-time use (framed with International Classification of Disease-10 codes).<sup>10</sup> Before live testing, we evaluated the accuracy of the e-triggers compared to manual chart review among 191 consecutive medical and surgical ICU patients over a two-week period. E-triggers were highly sensitive (>95%); specificity was 92%, with errors related primarily to intra-operative (not ICU) use of vasopressors for surgical patients and incorrect documentation of pre-admission disposition (i.e., missing data field instead of nursing home) by clinical staff. Coding was adjusted to address the vasopressor error.

**Adaptation and early validation of the NEST palliative care needs scale for ICU use.** The Needs; Existential concerns; Symptoms; and Therapeutic interaction (NEST) instrument is short, applicable to inpatients and family, scored as a continuous (range 0-130) or dichotomous value, and has strong psychometric properties based on past RCTs.<sup>1,2</sup> We performed a series of small pilot studies to evaluate the NEST, adapt it to an ICU setting, and assess the association between NEST score and

psychological distress. In Study 1, using an RCT database of 425 patients and family members provided by the instrument's developer, we found a mean=47 (SD 15) and ICC=0.52 between pre/post interviews.<sup>1</sup> In Study 2, we adapted a 10-item version of the NEST for the ICU setting by following a methodology similar to those who adapted the NEST for an emergency department setting,<sup>3</sup> and ensured that all 8 National Consensus Project Quality Domains were represented.<sup>4,5</sup> Formal cognitive testing with 10 ICU family members demonstrated acceptability and clarity. In Study 3, 32 ICU family members reported a median of 4 need domains with a mean total score=33 (range 3-89). Relevant domains correlated with PHQ-9 score ( $r=0.76$ ), GAD-7 score ( $r=0.85$ ), and satisfaction ( $r=0.55$ ). Total NEST score <20 (~15% of family members) reliably identified those with very low distress (PHQ-9 or GAD-7 <5), conceivably those with needs manageable by ICU teams alone. NEST scores were responsive to change over 1 week (median 9 units, range 1-19) and the distribution was free of ceiling or floor effects (range 3-89, skewness 0.6).

### 3. Figures

#### Clinician-facing PCplanner elements

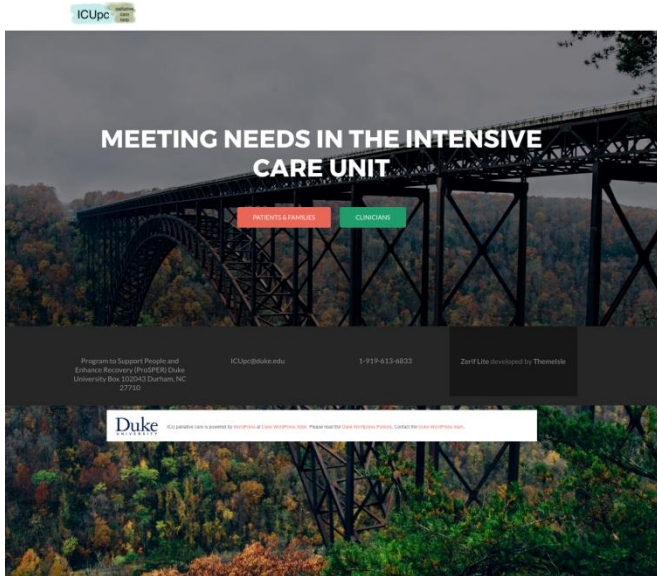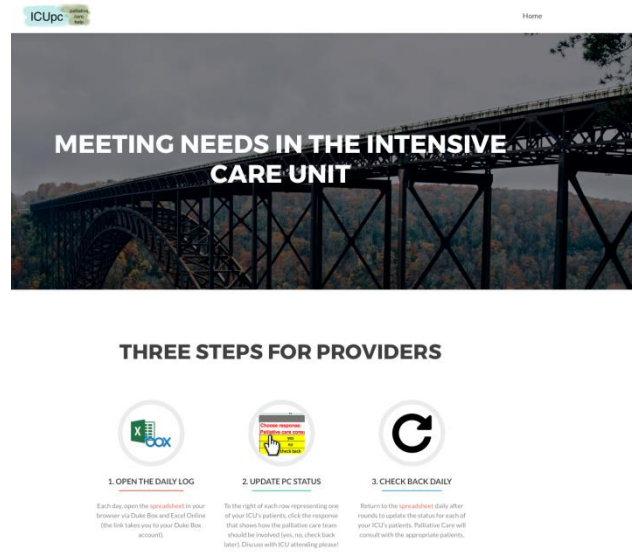

Download Log in Sign up

Sheet1

| 8/20/16                                                                                                                                                                                                                                                                                                                                                                                                                                                                                                                                                                                                                                                                                                                                                                                                                             |     | ICU team information |     |           |                          | Palliative care   |                             | Days w/ trigger + |                            | Palliative care consult OK? |         | ICU team response: |          | Palliative care team information |        |      |          |       |        |           |  |  |  |
|-------------------------------------------------------------------------------------------------------------------------------------------------------------------------------------------------------------------------------------------------------------------------------------------------------------------------------------------------------------------------------------------------------------------------------------------------------------------------------------------------------------------------------------------------------------------------------------------------------------------------------------------------------------------------------------------------------------------------------------------------------------------------------------------------------------------------------------|-----|----------------------|-----|-----------|--------------------------|-------------------|-----------------------------|-------------------|----------------------------|-----------------------------|---------|--------------------|----------|----------------------------------|--------|------|----------|-------|--------|-----------|--|--|--|
| ICU                                                                                                                                                                                                                                                                                                                                                                                                                                                                                                                                                                                                                                                                                                                                                                                                                                 | Bed | Name                 | MRN | Attending | trigger condition*       | Days w/ trigger + | Palliative care consult OK? | Chronic Contact   | Issues?                    | Consult status              | Finance | Trust              | Decision | Commun                           | Values | Info | Symptoms | Psych | Social | Spiritual |  |  |  |
| CCU                                                                                                                                                                                                                                                                                                                                                                                                                                                                                                                                                                                                                                                                                                                                                                                                                                 | 6   |                      |     |           | 3. Elderly + shock/vent  |                   | yes                         |                   |                            |                             |         |                    |          |                                  |        |      |          |       |        |           |  |  |  |
| CCU                                                                                                                                                                                                                                                                                                                                                                                                                                                                                                                                                                                                                                                                                                                                                                                                                                 | 11  |                      |     |           | 3. Elderly + shock/vent  | 17                | check back                  |                   | Does pt have DM?           |                             |         |                    |          |                                  |        |      |          |       |        |           |  |  |  |
| MICU                                                                                                                                                                                                                                                                                                                                                                                                                                                                                                                                                                                                                                                                                                                                                                                                                                | 7   |                      |     |           | 2. ICH, CVA, TBI + vent  | 5                 | check back                  |                   | Difficult social situation |                             |         |                    |          |                                  |        |      |          |       |        |           |  |  |  |
| MICU                                                                                                                                                                                                                                                                                                                                                                                                                                                                                                                                                                                                                                                                                                                                                                                                                                | 17  |                      |     |           | 1. Cardiac arrest + vent | 5                 | check back                  |                   |                            |                             |         |                    |          |                                  |        |      |          |       |        |           |  |  |  |
| NeuroICU                                                                                                                                                                                                                                                                                                                                                                                                                                                                                                                                                                                                                                                                                                                                                                                                                            | 18  |                      |     |           | 3. Elderly + shock/vent  | 4                 | yes                         |                   |                            | Ready!                      | 0       | 0                  | 10       | 0                                | 0      | 0    | 10       | 10    | 7      | 3         |  |  |  |
| SICU                                                                                                                                                                                                                                                                                                                                                                                                                                                                                                                                                                                                                                                                                                                                                                                                                                | 3   |                      |     |           | 3. Elderly + shock/vent  | 4                 |                             |                   |                            |                             |         |                    |          |                                  |        |      |          |       |        |           |  |  |  |
| SICU                                                                                                                                                                                                                                                                                                                                                                                                                                                                                                                                                                                                                                                                                                                                                                                                                                | 18  |                      |     |           | 5. Nursing home res.     | 9                 |                             |                   |                            |                             |         |                    |          |                                  |        |      |          |       |        |           |  |  |  |
| DRH                                                                                                                                                                                                                                                                                                                                                                                                                                                                                                                                                                                                                                                                                                                                                                                                                                 | 22  |                      |     |           | 3. Elderly + shock/vent  | 2                 | yes                         |                   | Enrolled                   | Ready!                      | 0       | 0                  | 0        | 0                                | 0      | 1    | 4        | 0     | 0      | 10        |  |  |  |
| DRH                                                                                                                                                                                                                                                                                                                                                                                                                                                                                                                                                                                                                                                                                                                                                                                                                                 | 13  |                      |     |           | 3. Elderly + shock/vent  | 12                | yes                         |                   | Enrolled                   | Ready!                      | 0       | 1                  | 0        | 2                                | 5      | 7    | 5        | 8     | 1      | 2         |  |  |  |
| <b>Problems:</b> 919-613-6833 or page Christopher Cox<br>*Trigger not (don't touch)   *Trigger abbreviations (don't touch)   *Don't touch!<br>Cardiac arrest + ventilation <48 hrs   1. Cardiac arrest + vent   Ready   1. Expected survival <24 hrs per med team<br>ICH, stroke, TBI + vent <48 hrs   2. ICH, CVA, TBI + vent   not ready   2. Patient<br>Elderly <70 + shock AND/OR vent <48 hrs   3. Elderly + shock/vent   no   ACTIVE   3. Patient has decisional capacity<br>Dementia + shock AND/OR vent <48 hrs   4. Dementia + shock/vent   check back   4. Patient has no known family<br>In skilled nursing facility (SNF) or long-term acute care (LTAC) before hospitalization   5. Nursing home res.      <br>Elderly (>75) + activities of daily living limitations before hospitalization   6. Elderly + disability |     |                      |     |           |                          |                   |                             |                   |                            |                             |         |                    |          |                                  |        |      |          |       |        |           |  |  |  |

## Family-facing PCplanner elements

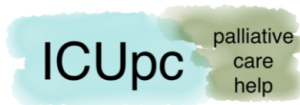

FOR PATIENTS, FAMILIES, AND CLINICIANS

[PURPOSE](#) [VIDEO](#) [WHAT I NEED](#)

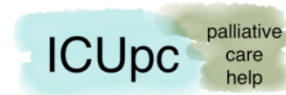

FOR PATIENTS, FAMILIES, AND CLINICIANS

[PURPOSE](#) [VIDEO](#) [WHAT I NEED](#)

[CLICK HERE TO COMPLETE SHORT SURVEY](#)

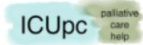

### **The 5-minute help page**

#### **PURPOSE**

The ICU can be overwhelming. Patients are critically ill. Family members are stressed. *What can we expect? How can I make good medical decisions? Who can give me the information I need?*

ICUpc.org can help you navigate the ICU experience. ICUpc was developed by patients, family members, doctors, and nurses. Its purpose is to describe palliative care. Palliative care is provided by a team of clinicians who aim to improve quality of life. They do this by focusing on what is most important to people. Patients and families can receive palliative care regardless of age, diagnosis or disease stage, or ongoing treatments.

Using ICUpc takes less than 5 minutes:

1. Watch a **short video** to learn about the purpose of palliative care and how it could help you and your loved one in the ICU.
2. Answer a **brief survey** to let us know how you are feeling and what you need right now.

#### **VIDEO**

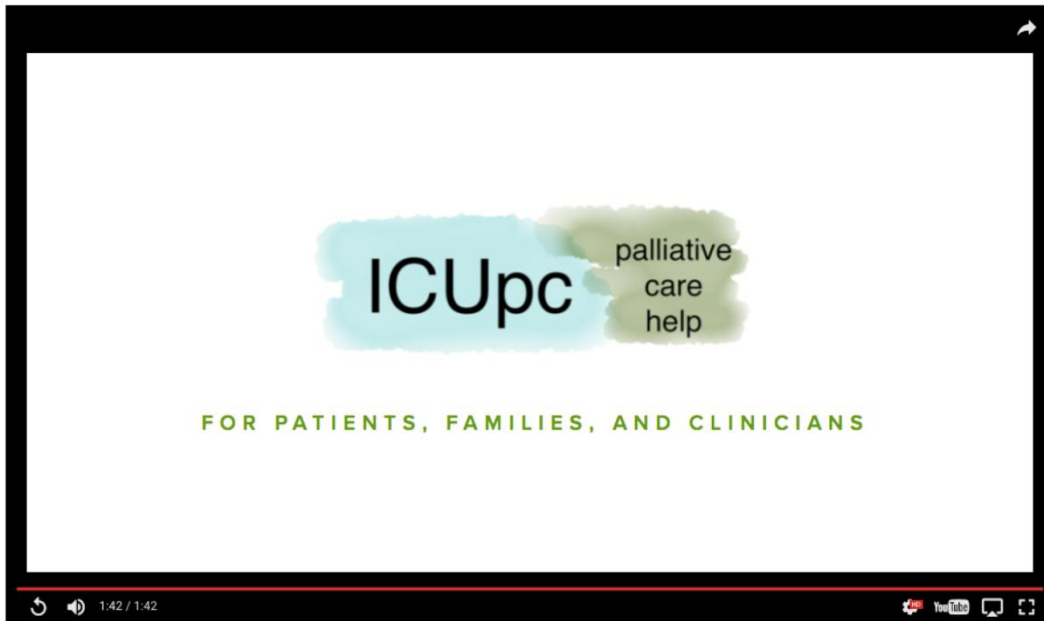

Thanks so much for your time!

[Edit](#)

### 3. Tables

**eTable 1: Measures gathered from each cohort**

| Characteristic                                                         | Intervention patients, n=14 | Intervention family members, n=18 | Control A: palliative care ICU patients, n=25 | Control B: medical ICU family members, n=49 | Control B: medical ICU patients, n=39 |
|------------------------------------------------------------------------|-----------------------------|-----------------------------------|-----------------------------------------------|---------------------------------------------|---------------------------------------|
| <b>Patient measures</b>                                                |                             |                                   |                                               |                                             |                                       |
| Patient length of stay, ventilation duration, disposition, hospice use | X                           | N/A                               | X                                             | N/A                                         | X                                     |
| Patient-level palliative care triggers                                 | X                           | N/A                               | X                                             | N/A                                         | X                                     |
|                                                                        |                             |                                   |                                               |                                             |                                       |
| <b>Family member measures</b>                                          |                             |                                   |                                               |                                             |                                       |
| NEST                                                                   | X                           | X                                 | N/A                                           | X                                           | N/A                                   |
| Perceived Stress Scale                                                 | X                           | X                                 | N/A                                           | X                                           | N/A                                   |
| Patient-Centeredness of Care Scale                                     | X                           | X                                 | N/A                                           | X                                           | N/A                                   |
| Goal-concordance of care                                               | X                           | X                                 | N/A                                           | X                                           | N/A                                   |
| Client Satisfaction Scale                                              | N/A                         | X                                 | N/A                                           | -                                           | N/A                                   |
| Systems Usability Scale                                                | N/A                         | X                                 | N/A                                           | -                                           | N/A                                   |

**Control A patients** served as the main comparator for the intervention's general impact on patient-level clinical outcomes; **Control B patients** served as a secondary comparator. **Control B family members** served as the main comparator for the intervention's general impact on family-level clinical outcomes.

**eTable 2: Study flow for intervention patients and family members**

| Characteristic                                           | n          |
|----------------------------------------------------------|------------|
| <b>Patients screened</b>                                 | <b>423</b> |
| <b>Patients excluded</b>                                 | <b>385</b> |
| Patient possessed decisional capacity                    | 219        |
| Patient <65 years old                                    | 98         |
| Patient discharged from ICU before medical team sign-off | 22         |
| Patient died before consent                              | 17         |
| Family unavailable                                       | 12         |
| Expected survival <24 hours                              | 12         |
| Family member needed translator                          | 3          |
| No known family                                          | 2          |
| <b>Refusals</b>                                          | <b>24</b>  |
| Physician                                                | 14         |
| Legal decision maker                                     | 10         |
| <b>Enrolled</b>                                          | <b>32</b>  |
| Patients                                                 | 14         |
| (Family members)                                         | (18)       |
| (Clinicians)                                             | (10)       |

**eTable 3: Characteristics of clinicians involved in intervention**

| <b>Characteristic</b>              | <b>n=10</b> |
|------------------------------------|-------------|
| <b>Age, no. (%)</b>                |             |
| 18 - 25                            | 1 (10)      |
| 26 - 45                            | 7 (70)      |
| 46 - 65                            | 2 (20)      |
| <b>Female, no. (%)</b>             | 9 (90)      |
| <b>Race, no. (%)</b>               |             |
| White                              | 6 (60)      |
| Asian                              | 3 (30)      |
| Black                              | 1 (10)      |
| <b>Hispanic ethnicity, no. (%)</b> | 0           |
| <b>ICU, no. (%)</b>                |             |
| Medical                            | 4 (40)      |
| Palliative care                    | 3 (30)      |
| Cardiac                            | 2 (20)      |
| Neurological                       | 2 (20)      |
| Surgical                           | 1 (10)      |
| <b>Role, no. (%)</b>               |             |
| Nurse                              | 5 (50)      |
| Physician                          | 2 (20)      |
| Advanced practice provider         | 2 (20)      |
| Social worker                      | 1 (10)      |

**eTable 4: Pre- and post-intervention scores for PCplanner intervention family members (n=18) and Control B medical ICU family member controls (n=49), expanded**

| Characteristic                                    | Pre-intervention | Post-intervention | Change, mean (SD) | Improvement, n (%) | Control, time 1 | Control, time 2 | Change, mean (SD) | Improvement, n (%) | p*     |
|---------------------------------------------------|------------------|-------------------|-------------------|--------------------|-----------------|-----------------|-------------------|--------------------|--------|
| <b>NEST total score,<sup>1</sup></b><br>mean (SD) | 48.8 (12.38)     | 36.1 (13.2)       | -12.7 (13.3)      | 12 (67)            | 31.1 (16.3)     | 35.1 (23.0)     | 3.4 (15.0)        | 8 (16)             | 0.0022 |
| median (IQR)                                      | 52 (36, 58)      | 38 (25.5, 46.5)   | -13 (5.8, 18.3)   |                    | 35 (20, 45)     | 41 (12, 52)     | 2 (-7, 9)         |                    | 0.005  |
| <b>NEST communication,</b><br>mean (SD)           | 8.1 (2.2)        | 1.6 (2.2)         | -7.5 (3.3)        | 7 (39)             | 1.7 (2.1)       | 2.0 (2.9)       | -0.3 (2.9)        | 8 (16)             | 0.0000 |
| median (IQR)                                      | 9 (8, 9.5)       | 1 (0, 3)          | -8 (-9, -2.8)     |                    | 1 (0, 3)        | 0 (0, 4)        | 0 (-1, 1)         |                    | 0.0000 |
| <b>NEST social,</b><br>mean (SD)                  | 7.9 (2.4)        | 2.4 (1.8)         | -5.5 (3.2)        | 13 (72)            | 1.9 (3.0)       | 2.3 (3.1)       | 0.4 (2.2)         | 7 (14)             | 0.0000 |
| median (IQR)                                      | 9 (5, 10)        | 2 (1, 3.5)        | -5.5 (-9, -3)     |                    | 0 (0, 2)        | 1 (0, 4)        | 0 (-1, 1)         |                    | 0.0000 |
| <b>NEST symptoms,</b><br>mean (SD)                | 6.6 (3.6)        | 5.6 (2.9)         | -1.6 (3.5)        | 7 (39)             | 5.7 (2.9)       | 5.7 (3.1)       | 0 (3.2)           | 21 (43)            | 0.15   |
| median (IQR)                                      | 8 (3.5, 10)      | 6 (4, 8)          | -0.5 (-4, 1)      |                    | 6 (3, 8)        | 5 (3, 9)        | 0 (0, 1)          |                    | 0.0000 |
| <b>NEST spiritual,</b><br>mean (SD)               | 4.7 (3.6)        | 3.9 (3.1)         | -0.8 (3.6)        | 7 (39)             | 4.7 (4.2)       | 4.3 (3.8)       | 0.4 (3.3)         | 14 (29)            | 0.89   |
| median (IQR)                                      | 5 (2, 7.5)       | 2.5 (1, 6.5)      | -0.5 (-3, 1)      |                    | 4 (0, 9)        | 4 (0, 8.3)      | 0 (-1.3, 1)       |                    | 0.66   |
| <b>NEST psychological,</b><br>mean (SD)           | 5 (3.4)          | 4.4 (3.4)         | -0.6 (3.4)        | 6 (33)             | 5.0 (3.7)       | 4.9 (4.3)       | 0.1 (2.1)         | 17 (35)            | 0.86   |
| median (IQR)                                      | 5 (1.5, 8)       | 3 (2, 7.5)        | 0 (-2.3, 1)       |                    | 5 (1, 9)        | 3 (1, 10)       | 0 (-1, 1)         |                    | 0.56   |
| <b>NEST values,</b><br>mean (SD)                  | 1.9 (1.9)        | 1.9 (1.7)         | 0 (2.2)           | 6 (33)             | 1.2 (1.8)       | 2.3 (3.2)       | -1.1 (2.9)        | 4 (8)              | 0.32   |
| median (IQR)                                      | 2 (0, 3.5)       | 1.5 (0.8, 3)      | 0 (-2, 2)         |                    | 0 (0, 2)        | 1 (0, 4)        | 0 (0, 3)          |                    | 0.51   |
| <b>NEST information,</b><br>mean (SD)             | 2.8 (2.6)        | 2.6 (2.2)         | 0.2 (1.5)         | 7 (39)             | 1.6 (1.6)       | 1.9 (2.5)       | -0.3 (2.9)        | 7 (14)             | 0.62   |
| median (IQR)                                      | 0 (2, 5)         | 0 (2, 5)          | -0.5 (-1.3, 0.3)  |                    | 1 (0, 3)        | 1 (0, 3)        | 0 (-1, 1)         |                    | 0.79   |



|                                                                          |               |               |                 |         |           |              |             |         |      |
|--------------------------------------------------------------------------|---------------|---------------|-----------------|---------|-----------|--------------|-------------|---------|------|
| <b>NEST cultural,</b><br>mean (SD)                                       | 0.5 (0.8)     | 0.9 (1.4)     | 0.4 (1.2)       | 1 (6)   | 0.4 (0.9) | 2.0 (3.7)    | -1.6 (2.9)  | 1 (2)   | 0.62 |
| median (IQR)                                                             | 0 (0, 1)      | 0 (0, 1.3)    | 0 (0, 0.3)      |         | 0 (0, 0)  | 0 (0, 4)     | 0 (0, 1)    |         | 0.84 |
| <b>NEST decisions,</b><br>mean (SD)                                      | 4.6 (3.9)     | 5.8 (2.9)     | 0.6 (3.8)       | 5 (28)  | 3.3 (3.3) | 3.0 (3.6)    | -0.3 (2.4)  | 11 (22) | 0.44 |
| median (IQR)                                                             | 5 (0.5, 8)    | 5.5 (3, 8.3)  | 0.5 (-2, 3)     |         | 2 (0, 7)  | 2 (0, 6)     | 0 (-1, 2)   |         | 0.59 |
| <b>NEST trust,</b><br>mean (SD)                                          | 1.2 (0.9)     | 1.8 (1.5)     | 0.6 (1.6)       | 3 (17)  | 1.4 (1.3) | 2.4 (2.8)    | 1.0 (2.4)   | 8 (16)  | 0.10 |
| median (IQR)                                                             | 1 (0.5, 2)    | 1.5 (1, 2.3)  | 0.5 (-0.3, 1)   |         | 1 (0, 2)  | 1 (0, 4)     | 0 (-1, 0)   |         | 0.07 |
| <b>NEST finances,</b><br>mean (SD)                                       | 4.2 (3.1)     | 5.3 (3.3)     | 0.9 (3.3)       | 4 (22)  | 4.9 (3.6) | 4.3 (3.7)    | 0.6 (2.3)   | 15 (31) | 0.11 |
| median (IQR)                                                             | 5 (1.5, 5.5)  | 5 (2.8, 8.3)  | 0 (-1, 2.3)     |         | 6 (1, 8)  | 5 (1, 7)     | 0 (-1, 1)   |         | 0.21 |
| <b>Patient-Centeredness<br/>of Care Scale,<sup>16</sup></b><br>mean (SD) | 37.5 (7.4)    | 42.1 (5.3)    | 6.6 (5.8)       | 12 (67) | -         | -            | -           | -       | -    |
| median (IQR)                                                             | 40 (29.5, 43) | 43 (37.8, 47) | 2.5 (-0.3, 6.3) |         | -         | -            | -           | -       | -    |
| <b>Perceived Stress<br/>Scale,<sup>17</sup></b><br>mean (SD)             | 9.7 (1.5)     | 8.8 (1.5)     | 0.8 (1.9)       | 12 (67) | -         | -            | -           | -       | -    |
| median (IQR)                                                             | 10 (, 10)     | 9 (7, 10)     | 1 (-0.3, 2.3)   |         | -         | -            | -           | -       | -    |
| <b>Quality of<br/>Communication,<sup>18</sup></b><br>mean (SD)           | 8.2 (1.8)     | 9.1 (0.8)     | 0.9 (1.6)       | 11 (61) | 7.8 (2.0) | 7.3 (2.8)    | -0.5 (1.8)  | 16 (33) | 0.03 |
| median (IQR)                                                             | 8 (8, 9.5)    | 9 (8.8, 10)   | 1 (0, 1.3)      |         | 8 (8, 10) | 8 (5.5, 9.8) | 0 (-1.8, 0) |         | 0.04 |
| <b>Optimism,<sup>19</sup></b><br>mean (SD)                               | 3.7 (0.5)     | 3.4 (0.6)     |                 | 1 (6)   | -         | -            | -           | -       | -    |
| agree / strongly agree,<br>no. (%)                                       | 18 (100)      | 14            |                 |         | -         | -            | -           | -       | -    |

|                                                                                                           |           |           |  |         |   |   |   |   |   |
|-----------------------------------------------------------------------------------------------------------|-----------|-----------|--|---------|---|---|---|---|---|
| <b>Hope,</b><br>mean (SD)                                                                                 | 3.9 (0.9) | 3.6 (1.2) |  | 1 (6)   | - | - | - | - | - |
| usually / always, no.<br>(%)                                                                              | 11        | 9         |  |         | - | - | - | - | - |
| <b>Social support,</b><br>mean (SD)                                                                       | 4 (1.2)   | 4.1 (1.1) |  | 3 (17)  | - | - | - | - | - |
| strongly agree / agree,<br>no. (%)                                                                        | 13        | 10        |  |         | - | - | - | - | - |
| <b>Self-efficacy,</b><br>mean (SD)                                                                        | 4.3 (0.9) | 4.5 (0.5) |  | 2 (11)  | - | - | - | - | - |
| strongly agree / agree,<br>no. (%)                                                                        | 16        | 13        |  |         | - | - | - | - | - |
| <b>Understand<br/>prognosis,</b> agree /<br>strongly agree, no. (%)                                       | 14 (78)   | 17 (94)   |  | 7 (39)  | - | - | - | - | - |
| <b>Understand patient's<br/>life support<br/>preferences,</b> agree /<br>strongly agree, no. (%)          | 18 (100)  | 18 (100)  |  | 5 (28)  | - | - | - | - | - |
| <b>Current treatment<br/>reflects patient<br/>values,</b> agree / strongly<br>agree, no. (%)              | 16 (89)   | 18 (100)  |  | 7 (39)  | - | - | - | - | - |
| <b>Trust the clinicians,<sup>20</sup></b><br>agree / strongly agree,<br>no. (%)                           | 18 (100)  | 18 (100)  |  | 10 (56) | - | - | - | - | - |
| <b>Conflict exists<br/>between family and<br/>clinicians,</b> disagree /<br>strongly disagree, no.<br>(%) | 17 (94)   | 18 (100)  |  | 5 (28)  | - | - | - | - | - |

**eTable 5: Patient clinical outcomes, expanded**

| <b>Variable</b>                                                                     | <b>Intervention patients, n=14</b> | <b>Control A: palliative care ICU patients, n=25</b> | <b>Control B: medical ICU patients, n=39</b> |
|-------------------------------------------------------------------------------------|------------------------------------|------------------------------------------------------|----------------------------------------------|
| <b>Hospital length of stay, total</b>                                               |                                    |                                                      |                                              |
| mean (SD)                                                                           | 20.5 (9.1)                         | 22.3 (16.0)                                          | 29.7 (16.1) *                                |
| median (IQR)                                                                        | 17.5 (14.8, 26.7)                  | 18 (8.3, 35.8)                                       | 29 (17, 36) †                                |
| <b>Hospital days before ICU admission, days</b>                                     |                                    |                                                      |                                              |
| mean (SD)                                                                           | 1.4 (4.4)                          |                                                      | -                                            |
| median (SD)                                                                         | 0 (0, 0)                           |                                                      | -                                            |
| <b>Hospital length of stay before palliative care consultation, days</b>            |                                    |                                                      |                                              |
| mean (SD)                                                                           | 13.8 (16.1)                        | 12.3 (13.2)                                          | -                                            |
| median (IQR)                                                                        | 5 (2, 29)                          | 5.5 (1.8, 23.5)                                      | -                                            |
| <b>Hospital length of stay after palliative care consultation, days</b>             |                                    |                                                      |                                              |
| mean (SD)                                                                           | 7.9 (6.2)                          | 9.7 (7.9)                                            | -                                            |
| median (IQR)                                                                        | 6 (3, 12.5)                        | 8 (2.5, 15.3)                                        | -                                            |
| <b>Intensive care unit length of stay</b>                                           |                                    |                                                      |                                              |
| mean (SD)                                                                           | 16.1 (8.1)                         | 11.5 (12.9)                                          | 15.1 (13.1)                                  |
| median (IQR)                                                                        | 15.5 (9.5, 25.3)                   | 7 (4.3, 13) †                                        |                                              |
| <b>Intensive care unit length of stay before palliative care consultation, days</b> |                                    |                                                      |                                              |
| mean (SD)                                                                           | 3.6 (2.7)                          | 6.9 (7.1)                                            | -                                            |
| median (IQR)                                                                        | 3 (1, 5.3)                         | 4.5 (1, 7.8)                                         | -                                            |
| <b>Intensive care unit length of stay after palliative care consultation, days</b>  |                                    |                                                      |                                              |
| mean (SD)                                                                           | 4.4 (4.2)                          | 5.1 (7.1)                                            | -                                            |

|                                                                             |                   |              |                  |
|-----------------------------------------------------------------------------|-------------------|--------------|------------------|
| median (IQR)                                                                | 3 (1,7)           | 2 (1, 8)     | -                |
| <b>Duration between eligibility and palliative care consultation, days</b>  |                   |              |                  |
| mean (SD)                                                                   | 1.5 (2.4)         | -            | -                |
| median (IQR)                                                                | 1 (0, 1)          | -            | -                |
| <b>Mechanical ventilation</b>                                               |                   |              |                  |
| no. (%)                                                                     | 9 (64)            | 15 (60)      | 27 (100%)        |
| Mechanical ventilation duration, days, mean (SD)                            | 15.5 (6.6)        | 12.2 (12.0)  | 17.3 (12.0)      |
| Mechanical ventilation duration, days, median (IQR)                         | 14.3 (11.6, 18.8) | 8 (4, 15)    | 15.9 (7.8, 20.4) |
| <b>Mechanical ventilation duration before palliative care consult, days</b> |                   |              |                  |
| mean (SD)                                                                   | 8.4 (4.1)         | 8.1 (9.7)    | -                |
| median (IQR)                                                                | 6.5 (6.3, 11.9)   | 6 (2.5, 9.5) | -                |
| <b>Mechanical ventilation duration after palliative care consult, days</b>  |                   |              |                  |
| mean (SD)                                                                   | 7.0 (6.2)         | 9.0 (10.4)   | -                |
| median (IQR)                                                                | 5.6 (3.0, 8)      | 7 (1, 12.5)  | -                |
| <b>Tracheotomy, no. (%)</b>                                                 | 4 (29)            | 4 (16)       | 3 (11)           |
| <b>CPR preference full care</b>                                             |                   |              |                  |
| pre-intervention, no. (%)                                                   | 13 (93)           | 22 (88)      | -                |
| post-intervention, no. (%)                                                  | 4 (29)            | 8 (32)       | -                |
| <b>CPR change after palliative care consult, days</b>                       |                   |              |                  |
| mean (SD)                                                                   | 4.6 (3.9)         | 5.3 (4.6)    | -                |
| median (IQR)                                                                | 4.5 (1.3, 7.3)    | 5 (1.3, 8.8) | -                |
| <b>Hospital Discharge Location, no. (%)</b>                                 |                   |              |                  |
| Home                                                                        | 1 (7)             | 2 (8)        | 8 (30)           |
| Inpatient rehabilitation facility                                           | 0                 | 0            | 5 (19)           |
| Skilled nursing facility                                                    | 2 (14)            | 1 (8)        | 3 (11)           |
| Long term acute care hospital                                               | 2 (14)            | 2 (16)       | 0                |

|                                       |         |         |        |
|---------------------------------------|---------|---------|--------|
| Transfer to other acute care hospital | 0       | 1 (4)   | 0      |
| Hospice                               | 5 (36)  | 5 (20)  | 2 (7)  |
| Home hospice                          | 2 (40)  | 0       | 0      |
| Inpatient hospice                     | 3 (60)  | 5 (100) | 2 (7)  |
| Died                                  | 4 (29)  | 14 (56) | 9 (33) |
| Withdrawal of treatment               | 4 (100) | 12 (42) | 7 (78) |

## 4. References

### References

1. Scandrett KG, Reitschuler-Cross EB, Nelson L, Sanger JA, Feigon M, Boyd E, Chang CH, Paice JA, Hauser JM, Chamkin A, Balfour P, Stolbunov A, Bennett CL, Emanuel LL. Feasibility and effectiveness of the NEST13+ as a screening tool for advanced illness care needs. *J Palliat Med.* 2010;13:161-169.
2. Richardson A, Medina J, Brown V, Sitzia J. Patients' needs assessment in cancer care: a review of assessment tools. *Support Care Cancer.* 2007;15:1125-1144.
3. Richards CT, Gisondi MA, Chang CH, Courtney DM, Engel KG, Emanuel L, Quest T. Palliative care symptom assessment for patients with cancer in the emergency department: validation of the Screen for Palliative and End-of-life care needs in the Emergency Department instrument. *J Palliat Med.* 2011;14:757-764. PMC:PMC3107583
4. Emanuel LL, Alpert HR, Emanuel EE. Concise screening questions for clinical assessments of terminal care: the needs near the end-of-life care screening tool. *J Palliat Med.* 2001;4:465-474.
5. Care NCPfQP. Clinical Practice Guidelines for Quality Palliative Care. Pittsburgh, PA: National Consensus Project; 2013:  
[http://www.nationalconsensusproject.org/NCP\\_Clinical\\_Practice\\_Guidelines\\_3rd\\_Edition.pdf](http://www.nationalconsensusproject.org/NCP_Clinical_Practice_Guidelines_3rd_Edition.pdf).
6. Teno JM, Gozalo P, Khandelwal N, Curtis JR, Meltzer D, Engelberg R, Mor V. Association of Increasing Use of Mechanical Ventilation Among Nursing Home Residents With Advanced Dementia and Intensive Care Unit Beds. *JAMA Intern Med.* 2016.
7. Guerra C, Hua M, Wunsch H. Risk of a Diagnosis of Dementia for Elderly Medicare Beneficiaries after Intensive Care. *Anesthesiology.* 2015;123:1105-1112. PMC:PMC4618156
8. Hanson LC, Zimmerman S, Song M, et al. Effect of the goals of care intervention for advanced dementia: A randomized clinical trial. *JAMA Internal Medicine.* 2017;177:24-31.
9. Lagu T, Zilberberg MD, Tjia J, Pekow PS, Lindenauer PK. Use of mechanical ventilation by patients with and without dementia, 2001 through 2011. *JAMA Internal Medicine.* 2014;174:999-1001.
10. Meaningful Clinical Use Common Data Set elements. 2016.  
[https://www.healthit.gov/sites/default/files/commonclinicaldataset\\_ml\\_11-4-15.pdf](https://www.healthit.gov/sites/default/files/commonclinicaldataset_ml_11-4-15.pdf).
11. Iwashyna TJ. Trajectories of recovery and dysfunction after acute illness, with implications for clinical trial design. *Am J Respir Crit Care Med.* 2012;186:302-304. PMC:PMC3443808
12. Iwashyna TJ, Cooke CR, Wunsch H, Kahn JM. Population burden of long-term survivorship after severe sepsis in older Americans. *J Am Geriatr Soc.* 2012;60:1070-1077. PMC:3374893
13. Gill TM, Allore HG, Gahbauer EA, Murphy TE. Change in disability after hospitalization or restricted activity in older persons. *JAMA.* 2010;304:1919-1928. PMC:PMC3124926
14. Gill TM, Allore HG, Holford TR, Guo Z. Hospitalization, restricted activity, and the development of disability among older persons. *JAMA.* 2004;292:2115-2124.

15. Ehlenbach WJ, Barnato AE, Curtis JR, Kreuter W, Koepsell TD, Deyo RA, Stapleton RD. Epidemiologic study of in-hospital cardiopulmonary resuscitation in the elderly. *N Engl J Med.* 2009;361:22-31. PMC:PMC2917337
16. Stewart M, Brown JB, Donner A, McWhinney IR, Oates J, Weston WW, Jordan J. The impact of patient-centered care on outcomes. *J Fam Pract.* 2000;49:796-804.
17. Cohen S, Kamarck T, Mermelstein R. A global measure of perceived stress. *J Health Soc Behav.* 1983;24:385-396.
18. Engelberg R, Downey L, Curtis JR. Psychometric characteristics of a quality of communication questionnaire assessing communication about end-of-life care. *J Palliat Med.* 2006;9:1086-1098.
19. Scheier MF, Carver CS, Bridges MW. Distinguishing optimism from neuroticism (and trait anxiety, self-mastery, and self-esteem): a reevaluation of the Life Orientation Test. *J Pers Soc Psychol.* 1994;67:1063-1078.
20. Dugan E, Trachtenberg F, Hall MA. Development of abbreviated measures to assess patient trust in a physician, a health insurer, and the medical profession. *BMC Health Serv Res.* 2005;5:64.
